# Supplementary material
Source: Frontiers journal article supplement (https://www.frontiersin.org/articles/491128)
Supplement: Data_Sheet_1.pdf [file Data_Sheet_1.pdf]

# The Learning Sciences Framework in Educational Leadership

Tracey Tokuhamma-Espinosa, Ph.D.\*<sup>1</sup>

## Supplementary Material

### Appendix A

|                                                                   |                        |
|-------------------------------------------------------------------|------------------------|
| Academic Achievement (Structures, Processes)                      | J, V, GG, RR, YY, KKK  |
| Accountability                                                    | EE, KK                 |
| Affirmation/Celebration                                           | HHH                    |
| After-school Programs                                             | N                      |
| Change agent                                                      | HHH                    |
| Change Management                                                 | BB, V                  |
| Communication                                                     | L, M, S, EE, HHH       |
| Contingent rewards                                                | HHH                    |
| Culture (school) (intelligence)                                   | KK, SS, HHH            |
| Curriculum                                                        | V, EE, KK, WW, HHH     |
| Data-driven decision making                                       | EE, KK                 |
| Discipline                                                        | HHH                    |
| Diversity                                                         | KKK, WWW               |
| Establishing goals and expectations                               | V                      |
| Ethical/Moral guidance                                            | I, KKK                 |
| Evaluation/Assessment                                             | V, EE, KK, LL, PP, HHH |
| Extra-curricular activities                                       | VV                     |
| Flexibility (with change, stress)                                 | HHH                    |
| Focus (goals)                                                     | KK, NN, WW, HHH        |
| Ideas (beliefs)                                                   | HHH                    |
| Innovation and Creativity                                         | R, AA                  |
| Input (from others)                                               | HHH                    |
| Instruction                                                       | Y, Z, EE               |
| Intellectual stimulation (stays informed)                         | HHH                    |
| Optimizer (inspires others)                                       | HHH                    |
| Order (enforces rules)                                            | HHH                    |
| Outreach (community)                                              | KK, NN, HHH            |
| People (see relationships)                                        |                        |
| Planning, coordinating and evaluating teaching and the curriculum | EE                     |
| Professional Development                                          | EE                     |

## Learning Sciences Framework in Educational Leadership

|                                                                 |                                     |
|-----------------------------------------------------------------|-------------------------------------|
| Promoting and taking part in teacher learning                   | PP                                  |
| Human Resources/Recruitment                                     | NN                                  |
| Relationship (with staff, students, parents)/Community building | V, FF, KK, PP, WW                   |
| Resources (materials, equipment)                                | L, V, EE, KK, WW, HHH               |
| Safety                                                          | EE, RR                              |
| School Environment/Community Building                           | A, D, L, V, EE, FF, HH, KK, WW, FFF |
| School Growth                                                   | V                                   |
| School Organization                                             | EE, JJ, KK                          |
| Self-efficacy (collective, teacher, student)                    | B, C, U, DD, MM                     |
| Service-learning                                                | G, L, GGG                           |
| Situational awareness (aware of relationships)                  | V, KK, HHH                          |
| Social-Emotional Learning                                       | O, P, Q, II, UU, YY                 |
| Strategic resourcing                                            | NN, PP, WW                          |
| Technology                                                      | OO, BBB, DDD                        |
| Values                                                          | V                                   |
| Visibility                                                      | HHH                                 |
| Vision and Goals                                                | V, KK                               |

### Legend to Appendix A

- A. Allen, K., Kern, M. L., Vella-Brodrick, D., Hattie, J., & Waters, L. (2018). What schools need to know about fostering school belonging: A meta-analysis. *Educational Psychology Review* 30, 1–34. DOI 10.1007/s10648-016-9389-8
- B. Aloe, A. M., Amo, L. C., & Shanahan, M. E. (2014). Classroom management self-efficacy and burnout: A multivariate meta-analysis. *Educational Psychology Review*, 26(1), 101-126.
- C. Angelle, P., & M. Teague, G. (2014). Teacher leadership and collective efficacy: Teacher perceptions in three US school districts. *Journal of Educational Administration*, 52(6), 738-753.
- D. Bektas, F., Çogaltay, N., Karadag, E., & Ay, Y. (2015). School culture and academic achievement of students: A meta-analysis study. *The Anthropologist*, 21(3), 482-488.
- E. Blank, R. K., & De Las Alas, N. (2009). *The effects of teacher professional development on gains in student achievement: How meta analysis provides scientific evidence useful to education leaders*. Washington, DC: Council of Chief State School Officers.
- F. Boyce, J., & Bowers, A. J. (2018). Toward an evolving conceptualization of instructional leadership as leadership for learning: Meta-narrative review of 109 quantitative studies across 25 years. *Journal of Educational Administration*, 56(2).
- G. Celio, C. I., Durlak, J., & Dymnicki, A. (2011). A meta-analysis of the impact of service-learning on students. *Journal of Experiential Education*, 34(2), 164-181.
- H. Darling-Hammond, L., Wei, R. C., Andree, A., Richardson, N., & Orphanos, S. (2009). Professional learning in the learning profession. *Washington, DC: National Staff Development Council*, 12.
- I. Day, C., & Sammons, P. (2013). *Successful leadership: A review of the international literature*. Reading, UK: CfBT Education Trust.

- J. Day, C., Gu, Q., & Sammons, P. (2016). The impact of leadership on student outcomes: How successful school leaders use transformational and instructional strategies to make a difference. *Educational Administration Quarterly*, 52(2), 221-258.
- K. Devine, J. F., & Cohen, J. (2007). *Making your school safe: Strategies to protect children and promote learning*. New York, NY: Teachers College Press.
- L. DiPaola, M., & Hoy, W. K. (Eds.). (2015). *Leadership and school quality*. IAP.
- M. Dulebohn, J. H., Bommer, W. H., Liden, R. C., Brouer, R. L., & Ferris, G. R. (2012). A meta-analysis of antecedents and consequences of leader-member exchange: Integrating the past with an eye toward the future. *Journal of Management*, 38(6), 1715-1759.
- N. Durlak, J. A., Weissberg, R. P., & Pachan, M. (2010). A meta-analysis of after-school programs that seek to promote personal and social skills in children and adolescents. *American Journal of Community Psychology*, 45(3-4), 294-309.
- O. Durlak, J. A., Weissberg, R. P., Dymnicki, A. B., Taylor, R. D., & Schellinger, K. B. (2011). The impact of enhancing students' social and emotional learning: A meta-analysis of school-based universal interventions. *Child Development*, 82(1), 405-432.
- P. Elbertson, N. A., Brackett, M. A., & Weissberg, R. P. (2010). School-based social and emotional learning (SEL) programming: Current perspectives. In *Second international handbook of educational change* (pp. 1017-1032). Springer, Dordrecht.
- Q. Elias, M. J. (2009). Social-emotional and character development and academics as a dual focus of educational policy. *Educational Policy*, 23(6), 831-846.
- R. Ellis, A. K. (2014). *Research on educational innovations*. New York, NY: Routledge.
- S. Gayle, B. M., Preiss, R. W., Burrell, N., & Allen, M. (2009). *Classroom communication and instructional processes: Advances through meta-analysis*. New York, NY: Routledge.
- T. Grissom, J. A., Loeb, S., & Master, B. (2013). Effective instructional time use for school leaders: Longitudinal evidence from observations of principals. *Educational Researcher*, 42(8), 433-444.
- U. Gurley, D. K., Anast-May, L., O'Neal, M., & Dozier, R. (2016). Principal instructional leadership behaviors: Teacher vs. self-perceptions. *International Journal of Educational Leadership Preparation*, 11(1), n1.
- V. Hallinger, P. (2011). Leadership for learning: Lessons from 40 years of empirical research. *Journal of Educational Administration*, 49(2), 125-142.
- W. Hallinger, P. (2014). Reviewing reviews of research in educational leadership: An empirical assessment. *Educational Administration Quarterly*, 50(4), 539-576.
- X. Hallinger, P., & Heck, R. H. (1996). Reassessing the principal's role in school effectiveness: A review of empirical research, 1980-1995. *Educational Administration Quarterly*, 32(1), 5-44.
- Y. Hallinger, P., & Heck, R. H. (1998). Exploring the principal's contribution to school effectiveness: 1980-1995. *School Effectiveness and School Improvement*, 9(2), 157-191.
- Z. Hallinger, P., Wang, W. C., & Chen, C. W. (2013). Assessing the measurement properties of the principal instructional management rating scale: A meta-analysis of reliability studies. *Educational Administration Quarterly*, 49(2), 272-309.
- AA. Hammond, M. M., Neff, N. L., Farr, J. L., Schwall, A. R., & Zhao, X. (2011). Predictors of individual-level innovation at work: A meta-analysis. *Psychology of Aesthetics, Creativity, and the Arts*, 5(1), 90.
- BB. Hauge, T. E., Norenes, S. O., & Vedøy, G. (2014). School leadership and educational change: Tools and practices in shared school leadership development. *Journal of Educational Change*, 15(4), 357-376.
- CC. Jackson, K. M., & Marriott, C. (2012). The interaction of principal and teacher instructional influence as a measure of leadership as an organizational quality. *Educational Administration Quarterly*, 48(2), 230-258.
- DD. Knox, J. A., & Anfara Jr, V. A. (2013). Understanding job satisfaction and its relationship to student academic performance. *Middle School Journal*, 44(3), 58-64.
- EE. Leithwood, K. (2012). *The Ontario leadership framework 2012*. Retrieved from the Institute for Education Leadership website: [http://iel.immix.ca/storage/6/1345688978/Final\\_Research\\_Report\\_-\\_EN.Pdf](http://iel.immix.ca/storage/6/1345688978/Final_Research_Report_-_EN.Pdf).

## Learning Sciences Framework in Educational Leadership

- FF. Leithwood, K., & Jantzi, D. (2008). Linking leadership to student learning: The contributions of leader efficacy. *Educational Administration Quarterly*, 44(4), 496-528.
- GG. Liebowitz, D. D., & Porter, L. (2019). The Effect of Principal Behaviors on Student, Teacher, and School Outcomes: A Systematic Review and Meta-Analysis of the Empirical Literature. *Review of Educational Research*, 0034654319866133.
- HH. Lomos, C., Hofman, R. H., & Bosker, R. J. (2011). Professional communities and student achievement—a meta-analysis. *School Effectiveness and School Improvement*, 22(2), 121-148.
- II. Mills, L. B. (2009). A meta-analysis of the relationship between emotional intelligence and effective leadership. *Journal of Curriculum and Instruction*, 3(2), 22.
- JJ. Moriano, J. A., Molero, F., Topa, G., & Mangin, J. P. L. (2014). The influence of transformational leadership and organizational identification on intrapreneurship. *International Entrepreneurship and Management Journal*, 10(1), 103-119.
- KK. Murphy, J., Elliott, S. N., Goldring, E., & Porter, A. C. (2006). Learning-Centered Leadership: A Conceptual Foundation. Learning Sciences Institute, Vanderbilt University (NJ1).
- LL. Murphy, J., Hallinger, P., & Heck, R. H. (2013). Leading via teacher evaluation: The case of the missing clothes?. *Educational Researcher*, 42(6), 349-354.
- MM. Paglis, L. L. (2010). Leadership self-efficacy: Research findings and practical applications. *Journal of Management Development*, 29(9), 771-782.
- NN. Pont, B., Nusche, D., & Moorman, H. (2008). *Improving school leadership*, Volume 1: Policy and practice. Australia: OECD Publications. Retrieved 5 August 2019 from <https://www.oecd.org/edu/school/44374889.pdf>
- OO. Ribble, M., & Miller, T. N. (2013). Educational Leadership in an Online World: Connecting Students to Technology Responsibly, Safely, and Ethically. *Journal of Asynchronous Learning Networks*, 17(1), 137-145.
- PP. Robinson, V. M. (2010). From instructional leadership to leadership capabilities: Empirical findings and methodological challenges. *Leadership and Policy in Schools*, 9(1), 1-26.
- QQ. Robinson, V. M., Lloyd, C. A., & Rowe, K. J. (2008). The impact of leadership on student outcomes: An analysis of the differential effects of leadership types. *Educational Administration Quarterly*, 44(5), 635-674.
- RR. Robinson, V., & Gray, E. (2019). What difference does school leadership make to student outcomes?. *Journal of the Royal Society of New Zealand*, 49(2), 171-187.
- SS. Rockstuhl, T., Seiler, S., Ang, S., Van Dyne, L., & Annen, H. (2011). Beyond general intelligence (IQ) and emotional intelligence (EQ): The role of cultural intelligence (CQ) on cross-border leadership effectiveness in a globalized world. *Journal of Social Issues*, 67(4), 825-840.
- TT. Scheerens, J. (Ed.). (2012). *School leadership effects revisited: Review and meta-analysis of empirical studies*. Springer Science & Business Media.
- UU. Schlaerth, A., Ensari, N., & Christian, J. (2013). A meta-analytical review of the relationship between emotional intelligence and leaders' constructive conflict management. *Group Processes & Intergroup Relations*, 16(1), 126-136.
- VV. Shulruf, B. (2010). Do extra-curricular activities in schools improve educational outcomes? A critical review and meta-analysis of the literature. *International Review of Education*, 56(5-6), 591-612.
- WW. Sinnema, C., Ludlow, L., & Robinson, V. (2016). Educational leadership effectiveness: a Rasch analysis. *Journal of Educational Administration*, 54(3), 305-339.
- XX. Sklad, M., Diekstra, R., Ritter, M. D., Ben, J., & Gravesteyn, C. (2012). Effectiveness of school-based universal social, emotional, and behavioral programs: Do they enhance students' development in the area of skill, behavior, and adjustment?. *Psychology in the Schools*, 49(9), 892-909.
- YY. Sun, J., & Leithwood, K. (2012). Transformational school leadership effects on student achievement. *Leadership and Policy in Schools*, 11(4), 418-451.
- ZZ. Sun, J., & Leithwood, K. (2015). Direction-setting school leadership practices: A meta-analytical review of evidence about their influence. *School Effectiveness and School Improvement*, 26(4), 499-523.

- AAA. Sun, J., & Leithwood, K. (2017). Leadership effects on student learning mediated by teacher emotions. In *How school leaders contribute to student success* (pp. 137-152). Springer, Cham.
- BBB. Tamim, R. M., Bernard, R. M., Borokhovski, E., Abrami, P. C., & Schmid, R. F. (2011). What forty years of research says about the impact of technology on learning: A second-order meta-analysis and validation study. *Review of Educational Research*, 81(1), 4-28.
- CCC. Timperley, H. (2011). A background paper to inform the development of a national professional development framework for teachers and school leaders. *Australian Institute for Teaching and School Leadership (AITSL)*, 1-26.
- DDD. Tondeur, J., Van Braak, J., Sang, G., Voogt, J., Fisser, P., & Ottenbreit-Leftwich, A. (2012). Preparing pre-service teachers to integrate technology in education: A synthesis of qualitative evidence. *Computers & Education*, 59(1), 134-144.
- EEE. Urick, A., & Bowers, A. J. (2017). Assessing international teacher and principal perceptions of instructional leadership: A multilevel factor analysis of TALIS 2008. *Leadership and Policy in Schools*, 1-21.
- FFF. Vanblaere, B., & Devos, G. (2016). Relating school leadership to perceived professional learning community characteristics: A multilevel analysis. *Teaching and Teacher Education*, 57, 26-38.
- GGG. Warren, J. L. (2012). Does service-learning increase student learning?: A meta-analysis. *Michigan Journal of Community Service Learning*, 18(2), 56-61.
- HHH. Waters, T., Marzano, R. J., & McNulty, B. (2004). McREL's balanced leadership framework: Developing the science of educational leadership. *ERS Spectrum*, 22(1), 4-10.
- III. Whitworth, B. A., & Chiu, J. L. (2015). Professional development and teacher change: The missing leadership link. *Journal of Science Teacher Education*, 26(2), 121-137.
- JJJ. Wiliam, D. (2016). *Leadership for teacher learning*. West Palm Beach, FL: Learning Sciences International.
- KKK. Wu, H., Gao, X., & Shen, J. (2019). Principal leadership effects on student achievement: a multilevel analysis using Programme for International Student Assessment 2015 data. *Educational Studies*, 1-21.
